# Supplementary material
Source: PubMed Central journal article supplement (PMC7159294)
Supplement: mmc1.pdf [file mmc1.pdf]

# THE LANCET

## Supplementary appendix

This appendix formed part of the original submission. We post it as supplied by the authors.

Supplement to: Calisher C, Carroll D, Colwell R, et al. Statement in support of the scientists, public health professionals, and medical professionals of China combatting COVID-19. *Lancet* 2020; published online Feb 18. [http://dx.doi.org/10.1016/S0140-6736\(20\)30418-9](http://dx.doi.org/10.1016/S0140-6736(20)30418-9).

## 支持中国抗击 2019 年新型冠状病毒疾病(COVID-19)疫情中的 科研、公共卫生、医务工作者的声明

我们是工作于公共卫生领域的科研人员，我们一直密切关注着此次新型冠状病毒疾病 COVID-19 的情况，并对该疾病给全球人类健康和福祉带来的影响深感担忧。同时我们也看到在中国的科研、公共卫生、以及医务工作者自该疾病出现以来努力而高效的工作，包括迅速鉴别出病原体、采取重大的措施来降低疫情的影响、以及透明地与全球健康界分享相关信息和成果。这些工作都值得称道。

通过签署此声明，我们将和所有继续在此次新型冠状病毒疾病爆发期间拯救生命、保护全球人类健康的中国科研、公共卫生、和医务工作者们团结在一起。面对该新型病毒的威胁，我们将同舟共济，与中国战斗在最前线的同行们一到来应对。

在这次疫情中相关数据迅速、公开且透明的共享如今正受到关于该疾病起源的谣言和错误信息的威胁。我们在此共同强烈谴责认为该新型冠状病毒疾病 COVID-19 并非自然起源的阴谋论。来自世界各国的科研工作者已经对引发该疾病的病原 SARS-CoV-2 的全基因组进行了分析并公开发表了结果，这些结果压倒性地证明了该冠状病毒和其它很多新发病原一样来源于野生动物。该科学结论也得到了来自美国国家科学、工程、医学院院长及其所代表的科学界人士的支持。阴谋论除了制造恐慌、谣言、偏见、损害全球共同抗击该疾病的工作外，别无它用。我们支持世界卫生组织总干事的呼吁：促进科学的论证和团结，而非误传和猜想。我们希望所有奋战在中国一线的科研和医务卫生工作者们知道，在此次与病毒的斗争中，我们同您们站在一起。

我们邀请更多的人加入我们，一同来支持在武汉和全中国的科研、公共卫生和医务工作者。和我们战斗在一线的同行们站在一起！
